# Supplementary material for: Morphological and Transcriptome Analyses Provide Insights into Growth Inhibition of Trichophyton rubrum Caused by Laser Irradiation
Source: Evid Based Complement Alternat Med. 2020 Apr 16;2020:6052461. doi: 10.1155/2020/6052461 (PMC7182975; doi:10.1155/2020/6052461)
Supplement: Supplementary Materials — Supplementary Table 1: a total of 346 DEGs were identified with a criterion |log2 (fold change)| > 2 and adjusted p value < 0.05 (using the Benjamini–Hochberg algorithm). [file 6052461.f1.xlsx]

## Sheet: Supp. Table 1
Supplementary Table 1. A total of 346 DEGs were identified with a criterion: |log2(fold change) | > 2 and adjusted p value < 0.05 (using the Benjamini-Hochberg algorithm).
gene_id	laser1	laser2	laser3	control1	control2	control3	mean RPKMs in laser	mean RPKMs in control	log2FoldChange	pvalue	padj	gene_name	gene_chr	gene_start	gene_end	gene_strand	gene_length	gene_biotype	gene_description	tf_family
10379774	0	0	0	12.9871	41.4145	5.74243	0	20.048	-6.88839	9.56e-06	7.68e-05	TERG_10541	NW_003456425.1	1392049	1392119	-	71	tRNA	tRNA-Gln	-
10376136	117.835	118.7	170.387	4897.07	4106.31	3845.13	135.641	4282.84	-4.97956	6.15e-85	5.48e-81	TERG_04547	NW_003456425.1	1763156	1764092	-	810	protein_coding	aquaporin	-
10378456	1.01582	2.59927	6.11645	102.042	89.1039	103.364	3.24385	98.1697	-4.8873	1.27e-15	8.92e-14	TERG_10527	NW_003456426.1	1079427	1079511	-	85	tRNA	tRNA-Gly	-
10378162	876.654	628.157	404.56	2600.21	34115.5	7531.77	636.457	14749.2	-4.53447	6.52e-06	5.48e-05	TERG_02842	NW_003456426.1	344020	345692	-	1605	protein_coding	hypothetical protein	FAD_binding_4
10378680	6.09493	3.46569	1.74756	117.812	48.9444	50.5334	3.76939	72.4298	-4.29401	3.56e-10	8.93e-09	TERG_10519	NW_003456427.1	1243899	1244000	+	102	tRNA	tRNA-Leu	-
10378014	19.3006	20.7942	53.3005	400.745	576.038	713.209	31.1318	563.331	-4.17125	3.78e-24	9.35e-22	TERG_08797	NW_003456426.1	2765108	2765521	+	159	protein_coding	hypothetical protein	-
10377475	3986.08	4862.37	3505.6	50443.8	81939.2	72923.1	4118.02	68435.4	-4.0547	1.24e-53	2.21e-50	TERG_08288	NW_003456416.1	128394	130618	+	1953	protein_coding	ATP-citrate synthase subunit 1	CoA_binding
10375911	6861.87	8097.59	6622.37	84641.7	141262	113616	7193.95	113173	-3.97559	1.07e-54	2.38e-51	TERG_05922	NW_003456423.1	1368516	1370162	+	1356	protein_coding	stearic acid desaturase	-
10373577	221.449	272.057	156.406	1099.27	3741.11	5235.94	216.637	3358.77	-3.95444	1.38e-18	1.76e-16	TERG_01841	NW_003456427.1	786434	787300	+	867	protein_coding	hypothetical protein	-
10378275	1632.43	1547.43	3287.16	12279.3	52886.3	33981.4	2155.67	33049	-3.93833	2.39e-18	2.8e-16	TERG_02958	NW_003456426.1	601950	604956	-	2522	protein_coding	assimilatory sulfite reductase	NAD_binding_1
10372073	714.123	943.535	1473.19	15169	15438.8	16911.4	1043.62	15839.7	-3.92355	9.5e-42	1.06e-38	TERG_07239	NW_003456420.1	707959	708954	+	996	protein_coding	zinc-binding dehydrogenase	-
10377471	3746.35	4899.63	3327.35	42759.2	78846.9	57935.3	3991.11	59847.1	-3.90639	3.15e-42	4.01e-39	TERG_08287	NW_003456416.1	126254	127791	-	1461	protein_coding	ATP-citrate-lyase	-
10372074	644.031	739.059	1536.98	11973.2	13167.3	15177.2	973.356	13439.2	-3.78705	9.86e-30	3.99e-27	TERG_07240	NW_003456420.1	709953	710374	-	422	protein_coding	hypothetical protein	-
10373817	0	2.59927	0.873779	20.4083	12.5498	16.0788	1.15768	16.3457	-3.77796	0.000838032	0.00357076	TERG_00503	NW_003456428.1	1311498	1312130	+	306	protein_coding	hypothetical protein	-
10373818	7.11075	4.33212	20.9707	168.833	114.204	148.155	10.8045	143.73	-3.72686	9.87e-13	4.09e-11	TERG_00504	NW_003456428.1	1313255	1313729	-	411	protein_coding	hypothetical protein	-
10373632	194.022	153.357	254.27	1107.62	4669.79	2177.53	200.549	2651.65	-3.72452	1.05e-17	1.1e-15	TERG_01896	NW_003456427.1	931007	933008	-	1398	protein_coding	hypothetical protein	-
10376852	217.386	299.783	436.016	1553.82	3414.81	7178.03	317.728	4048.89	-3.67112	7.02e-16	5.12e-14	TERG_08597	NW_003456412.1	65823	67385	-	1125	protein_coding	hypothetical protein	-
10375480	363.664	334.439	519.898	6180.94	5259.64	3963.42	406.001	5134.67	-3.66051	7.76e-40	6.28e-37	TERG_06267	NW_003456422.1	754168	754578	+	411	protein_coding	hypothetical protein	-
10376159	24.3797	47.6533	53.3005	217.998	691.496	643.152	41.7778	517.549	-3.62538	8.4e-16	6.03e-14	TERG_03908	NW_003456425.1	141255	141859	-	396	protein_coding	hypothetical protein	-
10376677	413.439	587.435	892.128	7834.02	8446.04	7087.3	631.001	7789.12	-3.62517	6e-34	2.97e-31	TERG_03660	NW_003456426.1	2426200	2427585	+	1386	protein_coding	hypothetical protein	-
10371593	70.0917	119.566	797.76	4747.72	3812.64	3116.99	329.139	3892.45	-3.56372	0.000634501	0.00282667	TERG_07504	NW_003456419.1	380135	381199	-	1065	protein_coding	sialidase	-
10377731	1665.95	1826.42	1242.51	10325.7	26593.1	18316	1578.29	18411.6	-3.54416	1.17e-25	3.46e-23	TERG_00313	NW_003456428.1	796174	797157	+	984	protein_coding	hemolysin-III channel protein Izh2	-
10371368	6.09493	4.33212	12.2329	129.871	45.1794	84.9879	7.55332	86.6795	-3.52011	3.64e-09	7.29e-08	TERG_08954	NW_003456418.1	76251	76588	-	282	protein_coding	hypothetical protein	-
10377929	65.0126	78.8445	171.261	1539.9	650.082	1428.72	105.039	1206.23	-3.52003	3.21e-17	3.01e-15	TERG_00431	NW_003456428.1	1131407	1131832	+	426	protein_coding	hypothetical protein	-
10376171	0	1.73285	4.36889	30.6125	18.8248	21.8212	2.03391	23.7528	-3.51251	0.000191266	0.00102619	TERG_08798	NW_003456425.1	166148	166478	-	252	protein_coding	hypothetical protein	-
10378791	61.9651	52.8518	291.842	2399.83	1061.72	1125.52	135.553	1529.02	-3.49529	3.93e-05	0.000267728	TERG_02134	NW_003456427.1	1495602	1497123	+	1461	protein_coding	indoleamine 2%2C3-dioxygenase	-
10377191	172.69	252.129	1024.07	8647.57	3739.85	3901.4	482.963	5429.61	-3.49072	3.74e-05	0.000256632	TERG_08444	NW_003456415.1	233220	233662	-	315	protein_coding	hypothetical protein	-
10376862	157.452	135.162	202.717	2963.85	1067.99	1498.77	165.11	1843.54	-3.4813	8.33e-21	1.45e-18	TERG_08614	NW_003456412.1	102137	102597	+	386	protein_coding	hypothetical protein	-
10374045	1805.11	1758.84	2374.93	15125.4	28055.2	22305.9	1979.63	21828.8	-3.46284	1.52e-34	8.44e-32	TERG_00569	NW_003456428.1	1473289	1475190	-	1773	protein_coding	hypothetical protein	-
10377053	7935.6	7031.03	3753.75	13015	139749	52009.2	6240.13	68257.6	-3.45135	4.4e-05	0.000292404	TERG_01566	NW_003456427.1	70166	71395	-	1161	protein_coding	hypothetical protein	-
10377355	215.354	219.205	1067.76	5773.7	6052.79	4575.57	500.772	5467.35	-3.44821	5.42e-12	2.02e-10	TERG_08343	NW_003456415.1	5314	5761	-	300	protein_coding	hypothetical protein	-
10371513	1210.86	1640.14	985.622	9443.49	20754.9	11602	1278.87	13933.5	-3.44551	4.65e-25	1.34e-22	TERG_07565	NW_003456419.1	546651	547085	+	369	protein_coding	hypothetical protein	-
10378549	34.5379	48.5197	115.339	1051.03	468.109	643.152	66.1321	720.763	-3.44357	7.9e-15	4.79e-13	TERG_03222	NW_003456426.1	1323780	1325431	-	1464	protein_coding	hypothetical protein	MFS_1
10378386	2495.87	2665.99	2548.81	26348.1	26958.3	29712.5	2570.22	27673	-3.42848	6.9e-69	3.07e-65	TERG_03065	NW_003456426.1	889120	891206	+	1812	protein_coding	NAD-dependent malic enzyme	Malic_M
10373821	9.14239	3.46569	27.9609	218.926	87.8489	126.333	13.523	144.369	-3.41373	2.17e-08	3.57e-07	TERG_00507	NW_003456428.1	1316738	1317393	-	597	protein_coding	hypothetical protein	-
10371514	1421.13	1645.34	1151.64	9262.6	23423	11981	1406.04	14888.9	-3.40447	4.54e-23	1.04e-20	TERG_07566	NW_003456419.1	547236	547766	+	531	protein_coding	hypothetical protein	-
10374708	53.8385	65.8482	423.783	3724.52	872.214	1080.72	181.156	1892.49	-3.38476	0.00180265	0.00679599	TERG_06054	NW_003456422.1	159186	159581	-	396	protein_coding	hypothetical protein	-
10379609	2513.14	3458.76	6506.16	52490.2	38846.8	36658.5	4159.35	42665.2	-3.35856	2.6e-22	5.14e-20	TERG_04234	NW_003456425.1	986967	987539	-	420	protein_coding	hypothetical protein	Hydrophobin
10373815	4838.36	4430.02	3177.93	26170	51266.1	42809.8	4148.77	40082	-3.27222	1.24e-27	4.43e-25	TERG_00501	NW_003456428.1	1305373	1306261	+	816	protein_coding	hypothetical protein	-
10376090	0	0	3.49511	13.9148	6.27492	13.7818	1.16504	11.3238	-3.2536	0.0161224	0.0414395	TERG_10542	NW_003456425.1	1644933	1645004	+	72	tRNA	tRNA-Arg	-
10376716	85.329	52.8518	316.308	2296.87	1051.68	925.679	151.496	1424.74	-3.2331	0.000119915	0.000693385	TERG_03699	NW_003456426.1	2522795	2524335	-	1431	protein_coding	hypothetical protein	-
10377544	115.804	129.964	266.502	2337.68	1303.93	1119.77	170.757	1587.13	-3.21563	6.91e-17	5.86e-15	TERG_00209	NW_003456428.1	535912	537720	+	1320	protein_coding	hypothetical protein	-
10372072	368.743	492.129	614.266	3967.57	5987.53	3725.69	491.713	4560.26	-3.21256	2.44e-28	9.46e-26	TERG_07238	NW_003456420.1	705333	707420	+	1833	protein_coding	glucoamylase	-
10377605	48.7594	64.1153	277.862	996.298	1639.01	991.143	130.245	1208.82	-3.21255	6.88e-10	1.62e-08	TERG_00267	NW_003456428.1	686390	687586	+	1197	protein_coding	hypothetical protein	-
10378613	4860.71	5369.23	7434.98	12090.1	113597	36477	5888.31	54054.8	-3.19849	0.000137485	0.000775769	TERG_01959	NW_003456427.1	1085374	1089745	-	4140	protein_coding	hypothetical protein	-
10372752	97.5189	86.6424	182.62	801.491	1467.08	1066.94	122.26	1111.84	-3.18332	2.04e-19	3.03e-17	TERG_04791	NW_003456424.1	203866	204679	-	324	protein_coding	hypothetical protein	-
10376570	0	2.59927	11.3591	63.0803	36.3945	28.7121	4.6528	42.729	-3.17914	0.000156743	0.000864418	TERG_08786	NW_003456426.1	2157454	2157770	+	255	protein_coding	hypothetical protein	-
10376300	28.443	25.9927	48.0578	238.406	478.149	207.876	34.1645	308.144	-3.16936	4.35e-14	2.26e-12	TERG_04047	NW_003456425.1	508450	509500	-	996	protein_coding	hypothetical protein	-
10377616	1174.29	1344.69	1120.18	3242.14	19989.4	9421.03	1213.05	10884.2	-3.16544	1.31e-11	4.5e-10	TERG_08259	NW_003456416.1	57087	58052	+	384	protein_coding	hypothetical protein	-
10375949	6.09493	8.66424	22.7182	137.292	112.949	86.1364	12.4925	112.126	-3.1556	1.09e-09	2.44e-08	TERG_05564	NW_003456423.1	411576	412250	-	675	protein_coding	hypothetical protein	-
10373497	798.436	845.629	3755.5	9090.98	22323.7	16609.4	1799.86	16008	-3.1528	0.000231973	0.00121662	TERG_01762	NW_003456427.1	562748	567609	-	4587	protein_coding	sulfite reductase beta subunit	-
10376192	9.14239	5.19854	19.2231	69.5739	135.538	93.0273	11.188	99.3798	-3.14437	6.09e-09	1.16e-07	TERG_03939	NW_003456425.1	227530	228176	+	378	protein_coding	hypothetical protein	-
10372827	4076.49	6063.23	3052.11	25436.2	63148.3	27714.1	4397.28	38766.2	-3.14009	1.42e-16	1.15e-14	TERG_04867	NW_003456424.1	384481	387479	+	2884	protein_coding	hypothetical protein	SAM_2
10377121	25372.2	28650	35561.9	208148	325849	252790	29861.4	262262	-3.13465	4.01e-34	2.1e-31	TERG_08639	NW_003456428.1	23705	28071	+	2228	protein_coding	Phosphoenolpyruvate carboxykinase AcuF	-
10373578	81.2657	75.3788	74.2712	240.262	786.875	980.806	76.9719	669.314	-3.11976	8.19e-13	3.42e-11	TERG_01842	NW_003456427.1	787579	788153	-	486	protein_coding	hypothetical protein	-
10374702	137.136	155.09	513.782	3728.23	1433.19	1627.4	268.669	2262.94	-3.07385	3.99e-10	9.94e-09	TERG_06048	NW_003456422.1	147985	148507	+	523	protein_coding	hypothetical protein	-
10371836	2635.04	2970.1	3338.71	15396.2	37377.2	22447.1	2981.28	25073.5	-3.07209	1.57e-21	2.92e-19	TERG_07285	NW_003456420.1	840839	842638	+	1554	protein_coding	hypothetical protein	-
10378789	271.224	309.313	592.422	4277.4	3157.54	2414.12	390.987	3283.02	-3.06936	6.38e-19	8.48e-17	TERG_02132	NW_003456427.1	1489537	1491951	-	2415	protein_coding	hypothetical protein	DUF323
10373820	10.1582	8.66424	30.5823	182.747	143.068	89.5819	16.4682	138.466	-3.06656	4.79e-09	9.33e-08	TERG_00506	NW_003456428.1	1315082	1315805	-	678	protein_coding	hypothetical protein	-
10379681	217.386	195.812	462.229	2898.91	1962.79	2429.05	291.809	2430.25	-3.05753	1.52e-18	1.88e-16	TERG_04308	NW_003456425.1	1167475	1169144	+	1467	protein_coding	MFS sugar transporter	Sugar_tr
10373636	190.974	207.942	206.212	1677.19	2089.55	1060.05	201.709	1608.93	-2.99535	1.98e-24	5.34e-22	TERG_01900	NW_003456427.1	940023	941559	-	1364	protein_coding	aquaglyceroporin	-
10372660	773.04	1036.24	1545.71	5673.52	11850.8	9232.67	1118.33	8919	-2.99523	1.02e-18	1.33e-16	TERG_05179	NW_003456424.1	1170339	1171748	+	1410	protein_coding	hypothetical protein	-
10378164	8062.58	7664.38	2937.64	14440.8	96525.8	36959.4	6221.53	49308.7	-2.9865	0.000234015	0.00122456	TERG_02844	NW_003456426.1	348731	350853	+	1662	protein_coding	hypothetical protein	MFS_1
10371222	3863.17	5330.24	2557.55	20432.5	45404.1	26063.7	3916.99	30633.4	-2.96726	5.92e-17	5.27e-15	TERG_07884	NW_003456418.1	354118	355922	-	1614	protein_coding	MFS multidrug transporter	MFS_1
10376163	90.4081	73.646	142.426	1025.98	550.938	801.643	102.16	792.854	-2.9562	6.37e-18	6.92e-16	TERG_03912	NW_003456425.1	147791	149346	+	1494	protein_coding	hypothetical protein	-
10379775	1591.79	1781.37	1310.67	11588.2	12839.7	11296.5	1561.28	11908.2	-2.93115	2.94e-40	2.61e-37	TERG_04399	NW_003456425.1	1392297	1394380	-	1503	protein_coding	phthalate transporter	MFS_1
10373916	466.262	353.501	443.006	2379.43	3914.29	3235.28	420.923	3176.33	-2.91585	7.03e-28	2.61e-25	TERG_08915	NW_003456421.1	250124	252155	+	855	protein_coding	hypothetical protein	-
10374994	2.03164	6.93139	11.3591	14.8424	91.6138	47.0879	6.77405	51.1814	-2.89738	0.00018046	0.000974683	TERG_10509	NW_003456428.1	2307060	2307130	+	71	tRNA	tRNA-Gly	-
10372939	96.5031	95.3066	134.562	694.811	1158.35	579.985	108.791	811.049	-2.89682	1.85e-18	2.25e-16	TERG_04979	NW_003456424.1	689827	690567	-	561	protein_coding	RNA exonuclease 4	-
10375573	24.3797	23.3934	58.5432	358.073	144.323	289.418	35.4388	263.938	-2.89501	3.18e-10	8.03e-09	TERG_06083	NW_003456422.1	246204	246941	-	615	protein_coding	secreted protein	-
10375053	56.886	60.6496	138.057	791.287	463.089	645.449	85.1976	633.275	-2.89229	4.45e-14	2.3e-12	TERG_01480	NW_003456428.1	3943384	3944035	+	513	protein_coding	hypothetical protein	-
10377555	173.705	175.018	207.086	1343.24	1464.57	1259.89	185.27	1355.9	-2.8709	4.04e-36	2.76e-33	TERG_00218	NW_003456428.1	562317	564366	+	1995	protein_coding	hypothetical protein	-
10378302	638.952	404.62	986.496	3077.02	7684.27	4041.52	676.689	4934.27	-2.86611	2.81e-13	1.28e-11	TERG_02985	NW_003456426.1	676176	679294	-	2847	protein_coding	WD repeat protein	Peptidase_M20
10372712	5636.79	4941.21	2729.68	8567.79	62089.1	26368.1	4435.9	32341.6	-2.8661	2.44e-08	3.99e-07	TERG_05363	NW_003456424.1	1621742	1622667	+	867	protein_coding	hypothetical protein	-
10377354	453.056	369.963	700.771	3151.23	4256.91	3524.7	507.93	3644.28	-2.84262	1.32e-22	2.73e-20	TERG_08344	NW_003456415.1	6474	7932	+	1404	protein_coding	hypothetical protein	-
10378455	3739.24	5523.45	5726.75	29220.1	34530.9	42293	4996.48	35348	-2.82256	5.09e-27	1.74e-24	TERG_03130	NW_003456426.1	1076009	1078138	+	2130	protein_coding	hypothetical protein	-
10373635	5.07911	5.19854	13.9805	65.8633	72.7891	33.3061	8.08604	57.3195	-2.81673	5.21e-06	4.49e-05	TERG_01899	NW_003456427.1	939315	939729	-	387	protein_coding	hypothetical protein	-
10371515	242.781	389.891	463.976	1250.47	4054.85	2365.88	365.549	2557.07	-2.80552	2.33e-12	9.25e-11	TERG_08945	NW_003456419.1	547878	548492	-	375	protein_coding	hypothetical protein	-
10378486	35.5538	58.0504	116.213	610.395	376.495	473.176	69.9389	486.689	-2.79581	7.63e-12	2.75e-10	TERG_03161	NW_003456426.1	1159382	1160919	+	1359	protein_coding	hypothetical protein	-
10378513	45.712	56.3175	113.591	343.231	751.735	392.782	71.8736	495.916	-2.78304	2.83e-11	8.94e-10	TERG_03186	NW_003456426.1	1221656	1222243	+	588	protein_coding	hypothetical protein	-
10374584	1846.76	2466.71	1564.06	5467.58	23297.5	11682.4	1959.18	13482.5	-2.78269	4.92e-11	1.46e-09	TERG_01334	NW_003456428.1	3522902	3525317	+	2175	protein_coding	C6 finger domain-containing protein	Zn_clus
10371837	3128.73	5722.73	5461.12	20657.9	41875	35454.9	4770.86	32662.6	-2.77523	3.53e-17	3.27e-15	TERG_07286	NW_003456420.1	843145	845251	-	2019	protein_coding	leucine rich repeat domain-containing protein	-
10377999	1387.61	1050.97	768.925	6269.07	8924.19	6697.97	1069.17	7297.08	-2.77109	1.27e-22	2.69e-20	TERG_03781	NW_003456426.1	2722259	2723938	-	1473	protein_coding	pyruvate dehydrogenase complex	Biotin_lipoyl
10373573	87.3607	55.4511	86.5041	275.512	660.122	606.4	76.4386	514.011	-2.74945	3.37e-13	1.48e-11	TERG_01837	NW_003456427.1	775460	776521	-	1062	protein_coding	glycosyl hydrolase	Glyco_hydro_3
10377821	101.582	111.769	380.094	1530.62	1024.07	1413.79	197.815	1322.83	-2.74046	8.58e-10	1.96e-08	TERG_08978	NW_003456417.1	317403	319322	+	1683	protein_coding	hypothetical protein	-
10375387	404.297	752.056	1094.84	2073.3	7149.64	5710.27	750.399	4977.74	-2.72934	5.11e-10	1.23e-08	TERG_01020	NW_003456428.1	2672958	2673947	-	852	protein_coding	hypothetical protein	-
10375043	1664.93	1115.95	3868.22	26822.1	6829.62	9894.2	2216.37	14515.3	-2.71131	0.00102009	0.00420751	TERG_00911	NW_003456428.1	2412801	2413150	+	291	protein_coding	hypothetical protein	-
10375676	11.174	18.1949	55.0481	89.0545	292.411	173.421	28.139	184.962	-2.709	2.55e-06	2.42e-05	TERG_08870	NW_003456423.1	670692	671022	+	189	protein_coding	hypothetical protein	-
10377450	23.3639	32.0577	69.0285	294.066	194.522	326.17	41.4834	271.586	-2.70655	1.8e-10	4.69e-09	TERG_08242	NW_003456416.1	15040	15393	-	354	protein_coding	hypothetical protein	-
10377685	258.019	431.479	681.547	1898.9	2615.39	4335.53	457.015	2949.94	-2.68968	4.62e-12	1.73e-10	TERG_08046	NW_003456417.1	23922	24779	-	858	protein_coding	hypothetical protein	-
10375562	22.3481	29.4584	80.3876	376.626	219.622	243.479	44.0647	279.909	-2.66398	9.45e-09	1.68e-07	TERG_06071	NW_003456422.1	212340	212971	-	237	protein_coding	hypothetical protein	-
10377896	558.702	1001.59	1180.48	5378.52	5621.07	6313.22	913.587	5770.94	-2.65872	3.18e-19	4.57e-17	TERG_00396	NW_003456428.1	1029522	1031360	+	1839	protein_coding	hypothetical protein	-
10371516	744.597	970.394	1183.1	2930.45	10957.3	4210.35	966.029	6032.69	-2.64241	3.61e-10	9.03e-09	TERG_07567	NW_003456419.1	548814	550811	+	1452	protein_coding	hypothetical protein	-
10379661	44.6961	58.0504	106.601	475.885	387.79	444.464	69.7825	436.046	-2.64036	5.56e-14	2.83e-12	TERG_04288	NW_003456425.1	1128886	1129497	+	555	protein_coding	hypothetical protein	-
10377604	82.2815	64.9818	199.222	611.322	921.158	627.073	115.495	719.851	-2.63822	7.7e-11	2.21e-09	TERG_00266	NW_003456428.1	685223	685918	-	570	protein_coding	hypothetical protein	-
10376189	68.06	75.3788	117.086	558.446	341.356	716.655	86.8417	538.819	-2.63211	1.41e-13	6.82e-12	TERG_03936	NW_003456425.1	219825	222388	+	2334	protein_coding	CAMK protein kinase	Pkinase
10375162	45.712	68.4475	118.834	522.268	430.459	490.403	77.6644	481.043	-2.62751	1.45e-13	6.98e-12	TERG_06245	NW_003456422.1	707036	707617	+	582	protein_coding	hypothetical protein	-
10378679	44.6961	60.6496	51.5529	420.226	249.742	282.527	52.2996	317.498	-2.60156	4.48e-15	2.79e-13	TERG_02024	NW_003456427.1	1242555	1243609	+	1014	protein_coding	hypothetical protein	-
10374434	99.5505	77.9781	242.91	1015.78	667.651	863.661	140.146	849.03	-2.59813	1.06e-10	2.95e-09	TERG_06749	NW_003456421.1	618847	620332	+	1266	protein_coding	hypothetical protein	-
10371333	117.835	204.476	311.065	609.467	2450.98	747.664	211.125	1269.37	-2.58667	1.53e-07	2e-06	TERG_08965	NW_003456418.1	544346	544735	+	390	protein_coding	hypothetical protein	-
10372495	2707.16	2645.19	3724.04	12094.7	23529.7	18381.5	3025.47	18002	-2.57284	2.17e-18	2.58e-16	TERG_05504	NW_003456423.1	263718	264735	-	678	protein_coding	thiol-specific antioxidant	-
10374580	1613.12	2327.21	832.711	3402.63	18652.8	6096.16	1591.02	9383.87	-2.56021	0.00182956	0.00687708	TERG_01330	NW_003456428.1	3514077	3514827	+	684	protein_coding	hypothetical protein	-
10379619	93.4556	126.498	274.367	586.276	1479.63	851.028	164.773	972.31	-2.55913	3.36e-09	6.84e-08	TERG_04244	NW_003456425.1	1018061	1018881	+	795	protein_coding	hypothetical protein	-
10378861	74.155	156.823	138.931	746.759	568.508	863.661	123.303	726.309	-2.55586	1.08e-14	6.33e-13	TERG_08720	NW_003456427.1	1670551	1670910	+	255	protein_coding	hypothetical protein	-
10372807	10.1582	16.462	39.32	144.714	107.929	136.67	21.9801	129.771	-2.55422	1.55e-07	2.03e-06	TERG_04847	NW_003456424.1	342299	342798	-	153	protein_coding	hypothetical protein	-
10374983	41.6487	45.054	114.465	371.988	533.368	277.933	67.0559	394.43	-2.55317	2.14e-09	4.54e-08	TERG_00853	NW_003456428.1	2270925	2272421	+	1497	protein_coding	hypothetical protein	-
10374585	264.114	273.79	422.909	690.173	3374.65	1502.22	320.271	1855.68	-2.53396	3.18e-08	4.97e-07	TERG_01335	NW_003456428.1	3525365	3525715	+	351	protein_coding	hypothetical protein	-
10374982	20.3164	38.1226	76.0187	326.533	277.351	176.867	44.8193	260.25	-2.5332	2.52e-08	4.11e-07	TERG_00852	NW_003456428.1	2268868	2269903	-	924	protein_coding	hypothetical protein	PhyH
10378582	83.2974	83.1767	137.183	918.375	306.216	531.749	101.219	585.447	-2.53239	4.18e-10	1.03e-08	TERG_03256	NW_003456426.1	1411704	1412639	+	873	protein_coding	hypothetical protein	-
10374583	512.99	560.576	637.858	2738.43	3944.41	3187.05	570.475	3289.96	-2.52735	8.78e-26	2.79e-23	TERG_01333	NW_003456428.1	3517904	3520013	-	1992	protein_coding	AGC/NDR protein kinase	Pkinase
10378986	608.477	797.976	808.245	3538.06	5882.11	3321.42	738.233	4247.2	-2.52394	2.14e-18	2.57e-16	TERG_02322	NW_003456427.1	1964658	1966865	+	2208	protein_coding	hypothetical protein	-
10378301	133.073	101.372	141.552	368.278	1347.85	445.612	125.332	720.581	-2.52272	1.61e-08	2.7e-07	TERG_02984	NW_003456426.1	674134	675748	-	1545	protein_coding	cytochrome P450 51	p450
10375503	49.7753	62.3825	92.6205	581.637	282.371	308.943	68.2594	390.984	-2.51731	3.96e-11	1.2e-09	TERG_08904	NW_003456422.1	1051566	1052238	+	366	protein_coding	hypothetical protein	-
10373206	13.2057	6.93139	13.1067	38.9614	97.8887	52.8303	11.0812	63.2268	-2.51181	1.03e-05	8.16e-05	TERG_10531	NW_003456426.1	1871149	1871253	-	105	tRNA	tRNA-Cys	-
10378985	116.819	161.155	214.076	862.716	1128.23	818.87	164.017	936.605	-2.51146	2.63e-17	2.52e-15	TERG_02321	NW_003456427.1	1963915	1964477	+	473	protein_coding	hypothetical protein	-
10372928	798.436	760.72	931.448	4527.87	3928.1	5699.93	830.201	4718.63	-2.50679	1.14e-25	3.46e-23	TERG_04966	NW_003456424.1	661039	661752	+	714	protein_coding	hypothetical protein	-
10373183	1105.21	1047.51	1334.26	7006.55	6788.21	5970.98	1162.33	6588.58	-2.5029	1.44e-30	6.4e-28	TERG_03414	NW_003456426.1	1812974	1820085	+	6918	protein_coding	acetyl-CoA carboxylase	Carboxyl_trans
10371354	717.17	739.059	913.099	2375.72	6287.47	4635.29	789.776	4432.82	-2.48842	1.99e-13	9.26e-12	TERG_07831	NW_003456418.1	212307	213107	+	744	protein_coding	hypothetical protein	-
10376811	406.329	396.822	380.094	1665.13	2773.51	2190.16	394.415	2209.6	-2.48573	6.72e-22	1.3e-19	TERG_02629	NW_003456427.1	2736675	2737338	+	444	protein_coding	hypothetical protein	-
10373404	36.5696	51.119	34.9511	292.21	212.092	182.609	40.8799	228.971	-2.48551	1.21e-12	4.93e-11	TERG_01672	NW_003456427.1	329378	330035	+	658	protein_coding	hypothetical protein	-
10379674	4715.44	4560.85	3512.59	12100.3	38830.5	20389.1	4262.96	23773.3	-2.47939	2.97e-11	9.29e-10	TERG_04301	NW_003456425.1	1155715	1156709	-	828	protein_coding	transcription factor RfeG	-
10372659	1798	1790.9	2364.45	5159.6	16263.3	11531.9	1984.45	10985	-2.46861	1.74e-11	5.85e-10	TERG_08852	NW_003456424.1	1169064	1169398	-	234	protein_coding	hypothetical protein	-
10377925	5.07911	3.46569	5.24267	20.4083	30.1196	25.2667	4.59582	25.2649	-2.45851	0.000711572	0.00310324	TERG_10506	NW_003456428.1	1122162	1122246	+	85	tRNA	tRNA-Gly	-
10379776	21458.2	25790.8	7568.67	62009.8	162291	76895.7	18272.6	100399	-2.45799	2.82e-08	4.5e-07	TERG_04400	NW_003456425.1	1395368	1397045	-	1611	protein_coding	monosaccharide transporter	Sugar_tr
10377759	161.516	150.758	185.241	718.93	670.161	1339.13	165.838	909.408	-2.45491	2.74e-14	1.47e-12	TERG_00341	NW_003456428.1	871253	872856	+	1572	protein_coding	NAD binding Rossmann fold oxidoreductase	GFO_IDH_MocA
10378450	127.994	241.732	310.191	1457.34	1009.01	1258.74	226.639	1241.7	-2.45254	2.77e-13	1.26e-11	TERG_03126	NW_003456426.1	1065942	1066923	-	844	protein_coding	hypothetical protein	-
10376164	158.468	437.544	261.26	1541.76	1340.32	1787.04	285.757	1556.37	-2.44412	3.12e-12	1.21e-10	TERG_03913	NW_003456425.1	149838	150713	-	876	protein_coding	hypothetical protein	-
10376417	1.01582	8.66424	10.4853	37.1061	42.6695	31.0091	6.7218	36.9282	-2.43675	0.000578249	0.00262201	TERG_04163	NW_003456425.1	801973	802446	-	342	protein_coding	hypothetical protein	-
10372826	429.693	652.417	356.502	2211.52	3060.91	2514.03	479.537	2595.49	-2.43584	3.08e-17	2.92e-15	TERG_04866	NW_003456424.1	383586	384289	+	704	protein_coding	hypothetical protein	-
10377959	170.658	119.566	214.076	593.697	1389.27	733.882	168.1	905.615	-2.42896	3.52e-11	1.08e-09	TERG_03741	NW_003456426.1	2633195	2633940	+	636	protein_coding	hypothetical protein	-
10373581	80.2499	105.704	200.095	883.124	584.822	606.4	128.683	691.449	-2.42442	2.86e-11	9e-10	TERG_01845	NW_003456427.1	794684	796480	-	1797	protein_coding	amidase	Amidase
10374589	21.3323	15.5956	30.5823	141.931	110.439	109.106	22.5034	120.492	-2.42178	3.62e-09	7.27e-08	TERG_01339	NW_003456428.1	3536298	3538309	+	1689	protein_coding	glutamate decarboxylase	-
10375795	982.299	864.691	1128.92	2208.74	9225.39	4510.1	991.971	5314.74	-2.42148	5.19e-09	1.01e-07	TERG_05808	NW_003456423.1	1060369	1061406	-	1038	protein_coding	hypothetical protein	-
10374211	1579.6	1263.25	959.409	6712.49	7829.84	5792.96	1267.42	6778.43	-2.4193	2.73e-20	4.67e-18	TERG_06560	NW_003456421.1	151330	152768	+	1218	protein_coding	pyruvate dehydrogenase E1 component alpha subunit	-
10377192	147.294	131.696	269.998	782.01	1270.04	884.334	182.996	978.796	-2.41795	1.09e-12	4.47e-11	TERG_08410	NW_003456415.1	148552	149868	+	1170	protein_coding	hypothetical protein	-
10373567	585.113	687.074	614.266	1537.12	6037.73	2481.88	628.818	3352.24	-2.41411	5.57e-09	1.07e-07	TERG_01831	NW_003456427.1	758154	760148	-	1791	protein_coding	hypothetical protein	AMP-binding
10378228	102.598	164.62	352.133	1507.43	887.274	898.116	206.45	1097.61	-2.40958	7.13e-09	1.32e-07	TERG_02908	NW_003456426.1	486999	488261	+	1098	protein_coding	hypothetical protein	-
10371106	518.069	772.85	1179.6	3954.58	3724.79	5447.27	823.507	4375.55	-2.4092	9.31e-14	4.63e-12	TERG_08168	NW_003456417.1	319697	320653	-	957	protein_coding	hypothetical protein	-
10371942	1687.28	1291.84	961.157	2234.71	11377.7	7297.48	1313.42	6969.96	-2.40782	1.03e-07	1.42e-06	TERG_06986	NW_003456420.1	6598	9370	+	2643	protein_coding	exo-beta-1%2C3-glucanase	-
10377787	1582.65	2192.92	2185.32	8232.91	12900	10493.7	1986.96	10542.2	-2.40733	3.08e-20	5.08e-18	TERG_08100	NW_003456417.1	160955	162024	+	963	protein_coding	CDP-diacylglycerol-inositol 3-phosphatidyltransferase	CDP-OH_P_transf
10375386	159.484	212.274	534.753	1962.91	1275.06	1571.13	302.17	1603.03	-2.4067	3.6e-09	7.25e-08	TERG_01019	NW_003456428.1	2670194	2672509	+	1572	protein_coding	hypothetical protein	LysM
10371205	100.566	61.5161	111.844	714.292	288.646	438.721	91.3087	480.553	-2.39813	4.56e-10	1.11e-08	TERG_08028	NW_003456418.1	725625	726304	-	680	protein_coding	hypothetical protein	-
10373063	212.307	271.191	963.778	3573.31	2189.95	1837.58	482.425	2533.61	-2.39249	7.69e-07	8.38e-06	TERG_03299	NW_003456426.1	1524685	1528272	-	3213	protein_coding	hypothetical protein	-
10377539	5169.52	4051.4	1691.64	7167.96	29563.7	20283.4	3637.52	19005	-2.38537	3.88e-07	4.55e-06	TERG_00204	NW_003456428.1	518742	519993	-	1191	protein_coding	mannitol-1-phosphate dehydrogenase	Mannitol_dh_C
10372354	252.94	232.202	359.997	2857.17	553.448	993.44	281.713	1468.02	-2.38199	5.87e-07	6.62e-06	TERG_06509	NW_003456421.1	20989	27578	+	6366	protein_coding	glutamate synthase	GATase_2
10373354	100.566	111.769	134.562	833.031	332.571	640.855	115.632	602.152	-2.38098	2.34e-11	7.61e-10	TERG_01624	NW_003456427.1	209950	211015	+	810	protein_coding	phosphomannomutase	-
10372086	97.5189	122.166	227.182	476.813	1202.27	645.449	148.956	774.845	-2.37702	6.23e-09	1.18e-07	TERG_07252	NW_003456420.1	733255	734862	+	1608	protein_coding	hypothetical protein	-
10372910	2693.96	3775.87	2945.51	9540.9	18981.6	20368.4	3138.45	16297	-2.37639	3.6e-14	1.9e-12	TERG_04949	NW_003456424.1	610333	612513	+	1914	protein_coding	siderophore iron transporter mirC	MFS_1
10376496	21428.8	27828.7	9856.22	68515.4	155450	82066.2	19704.5	102010	-2.37211	2.65e-09	5.49e-08	TERG_03886	NW_003456425.1	95886	97231	-	1161	protein_coding	amino acid transporter	AA_permease
10376640	610.509	968.662	628.247	4571.47	1930.17	4910.92	735.806	3804.18	-2.37014	4.45e-11	1.33e-09	TERG_03621	NW_003456426.1	2328289	2328916	+	315	protein_coding	hypothetical protein	-
10376976	1731.98	2224.11	3118.52	9349.8	12561.1	14446.8	2358.2	12119.2	-2.36138	3.01e-16	2.37e-14	TERG_08564	NW_003456413.1	139222	141324	-	2022	protein_coding	hypothetical protein	-
10372878	40.6329	56.3175	70.7761	353.435	263.547	245.776	55.9088	287.586	-2.36038	1.32e-12	5.31e-11	TERG_04917	NW_003456424.1	505133	507058	-	1764	protein_coding	acetolactate synthase	TPP_enzyme_N
10372066	23.3639	30.3248	99.6108	84.4163	552.193	145.858	51.0998	260.822	-2.34778	0.000298692	0.00149699	TERG_07134	NW_003456420.1	412168	413274	+	912	protein_coding	serine/threonine protein kinase	Pkinase
10372089	35.5538	45.054	161.649	384.975	529.603	320.427	80.7523	411.669	-2.34711	2.08e-06	2.04e-05	TERG_07255	NW_003456420.1	744295	744789	-	318	protein_coding	hypothetical protein	-
10377666	160.5	148.158	258.638	561.229	1467.08	860.216	189.099	962.84	-2.34694	5.03e-10	1.21e-08	TERG_08089	NW_003456417.1	126952	128675	-	1653	protein_coding	hypothetical protein	-
10375571	219.417	225.27	466.598	1220.79	1613.91	1772.11	303.762	1535.6	-2.33688	4.05e-12	1.53e-10	TERG_06081	NW_003456422.1	242024	243103	+	1080	protein_coding	hypothetical protein	-
10379045	170.658	207.075	502.423	1839.53	1339.07	1250.7	293.385	1476.43	-2.33059	2.15e-09	4.56e-08	TERG_02380	NW_003456427.1	2095259	2096840	-	1404	protein_coding	hypothetical protein	-
10377124	53.8385	81.4438	209.707	654.922	547.173	535.194	114.996	579.096	-2.3302	6.06e-08	8.93e-07	TERG_00010	NW_003456428.1	33757	35710	+	1716	protein_coding	amidase	Amidase
10371752	54.8544	130.83	204.464	870.137	646.317	447.909	130.05	654.788	-2.33014	5.16e-08	7.75e-07	TERG_07685	NW_003456419.1	856750	857643	+	639	protein_coding	hypothetical protein	-
10376680	1.01582	6.93139	14.8542	44.5273	27.6096	43.6424	7.60048	38.5931	-2.32941	0.00162338	0.00624448	TERG_03663	NW_003456426.1	2434290	2434737	-	333	protein_coding	hypothetical protein	-
10374643	34.5379	7.79781	35.8249	206.866	61.4942	120.591	26.0536	129.65	-2.3218	6.36e-05	0.000402047	TERG_06446	NW_003456422.1	1255108	1257917	-	1980	protein_coding	hypothetical protein	-
10372293	54.8544	76.2453	159.028	267.164	732.911	452.503	96.7091	484.192	-2.32079	2.4e-07	2.97e-06	TERG_06693	NW_003456421.1	488005	489418	-	1326	protein_coding	hypothetical protein	-
10372483	325.063	447.941	501.549	1686.47	2814.93	1862.84	424.851	2121.41	-2.31908	1.52e-15	1.05e-13	TERG_05492	NW_003456423.1	232338	233570	+	1170	protein_coding	hypothetical protein	-
10378013	798.436	702.669	664.072	1862.72	3362.1	5572.45	721.726	3599.09	-2.31808	8.38e-11	2.37e-09	TERG_08796	NW_003456426.1	2763436	2763874	+	360	protein_coding	hypothetical protein	-
10371199	17.269	12.9964	50.6792	200.373	67.7691	135.521	26.9815	134.554	-2.31736	3.74e-05	0.000256632	TERG_07781	NW_003456418.1	77029	78103	+	825	protein_coding	hypothetical protein	-
10378393	61.9651	76.2453	234.173	491.655	936.218	430.682	124.128	619.518	-2.31728	1.34e-06	1.38e-05	TERG_03072	NW_003456426.1	905860	906990	-	1131	protein_coding	hypothetical protein	-
10372575	1921.93	1522.31	2046.39	3205.04	15981	8179.51	1830.21	9121.84	-2.31725	1.27e-07	1.7e-06	TERG_05094	NW_003456424.1	975875	977613	-	1671	protein_coding	hypothetical protein	-
10376190	105.645	128.231	161.649	599.263	515.798	839.543	131.842	651.535	-2.30359	1.98e-14	1.09e-12	TERG_03937	NW_003456425.1	223318	224000	-	432	protein_coding	hypothetical protein	-
10378317	69.0759	33.7905	117.086	255.104	448.029	380.149	73.3176	361.094	-2.29899	6.94e-08	1e-06	TERG_02999	NW_003456426.1	711572	712173	+	543	protein_coding	hypothetical protein	-
10372510	11705.3	13686.9	13511.2	48095.9	78398.8	63995.9	12967.8	63496.9	-2.29173	3.04e-20	5.08e-18	TERG_05518	NW_003456423.1	301099	302164	-	876	protein_coding	short chain dehydrogenase	-
10374413	160.5	152.491	311.939	1751.41	503.249	789.009	208.31	1014.55	-2.28428	2.37e-07	2.94e-06	TERG_06508	NW_003456421.1	17013	19289	+	1647	protein_coding	hypothetical protein	-
10371731	46.7278	60.6496	72.5236	249.538	322.531	304.349	59.967	292.139	-2.27994	1.53e-13	7.31e-12	TERG_07464	NW_003456419.1	267015	268385	-	1371	protein_coding	class II DAHP synthetase	-
10377113	3567.57	3921.43	2222.89	14290.5	16538.2	16226.9	3237.3	15685.2	-2.27656	1.13e-17	1.17e-15	TERG_00042	NW_003456428.1	118734	120779	-	1977	protein_coding	hypothetical protein	-
10379553	1212.89	1157.54	879.021	5766.28	5055.07	4878.77	1083.15	5233.37	-2.27276	5.28e-23	1.15e-20	TERG_04682	NW_003456425.1	2064247	2066015	+	1554	protein_coding	cytochrome P450 phenylacetate hydroxylase	p450
10376174	983.315	1136.75	882.516	3169.79	5943.6	5312.89	1000.86	4808.76	-2.26422	1.75e-15	1.19e-13	TERG_03922	NW_003456425.1	170620	171584	-	906	protein_coding	PENR2 protein	HLH
10374433	160.5	160.288	175.63	757.891	635.022	978.51	165.473	790.474	-2.25605	1.6e-17	1.61e-15	TERG_06748	NW_003456421.1	617180	617915	+	672	protein_coding	hypothetical protein	-
10374870	382.965	468.735	504.17	517.63	4762.66	1188.68	451.957	2156.33	-2.25416	0.0111654	0.0306034	TERG_01460	NW_003456428.1	3881952	3883863	+	1623	protein_coding	hypothetical protein	COesterase
10373440	2460.32	3282.01	2636.19	14232	11527	14157.4	2792.84	13305.5	-2.25216	4.83e-23	1.08e-20	TERG_01707	NW_003456427.1	411370	412526	-	906	protein_coding	hypothetical protein	-
10374308	211.291	304.981	358.249	564.94	2511.22	1088.76	291.507	1388.31	-2.25076	5.25e-07	6e-06	TERG_08662	NW_003456428.1	1722546	1723012	-	447	protein_coding	hypothetical protein	-
10374707	375.854	318.844	569.704	3607.64	1031.6	1364.4	421.467	2001.21	-2.24768	1.6e-07	2.09e-06	TERG_06053	NW_003456422.1	156888	158409	+	1452	protein_coding	catalase	Catalase
10373633	10.1582	6.93139	31.456	65.8633	104.164	60.8697	16.1819	76.9655	-2.24265	0.000131003	0.000745562	TERG_01897	NW_003456427.1	934471	935778	+	1191	protein_coding	alkaline serine protease	Peptidase_S8
10379675	1940.22	1516.24	1021.45	3776.47	10287.1	7057.44	1492.64	7040.34	-2.23782	1.21e-09	2.69e-08	TERG_04302	NW_003456425.1	1157341	1157959	+	306	protein_coding	hypothetical protein	-
10374864	66.0284	70.1803	136.309	417.443	436.734	428.385	90.8394	427.521	-2.23219	2.53e-11	8.08e-10	TERG_01454	NW_003456428.1	3861889	3863329	+	1245	protein_coding	microsomal dipeptidase	-
10378678	1288.06	1369.82	776.789	5798.75	5480.51	4746.69	1144.89	5341.98	-2.22232	3.29e-16	2.55e-14	TERG_02023	NW_003456427.1	1238231	1239081	+	720	protein_coding	extracellular matrix protein	-
10376293	116.819	109.169	167.766	530.617	614.942	692.537	131.251	612.698	-2.22153	2.88e-15	1.86e-13	TERG_04040	NW_003456425.1	478829	479355	-	381	protein_coding	Spo12 family protein	-
10378892	404.297	390.757	609.898	1807.99	2080.76	2661.04	468.317	2183.27	-2.22047	1.43e-15	9.95e-14	TERG_02229	NW_003456427.1	1747914	1748418	+	381	protein_coding	hypothetical protein	-
10374339	32.5063	77.1117	85.6303	327.461	183.228	399.673	65.0828	303.454	-2.21792	1.43e-07	1.88e-06	TERG_08688	NW_003456428.1	3324417	3324770	+	354	protein_coding	hypothetical protein	-
10377928	70.0917	75.3788	132.814	543.604	273.586	477.77	92.7616	431.653	-2.21772	1.9e-09	4.1e-08	TERG_00430	NW_003456428.1	1129317	1129939	+	342	protein_coding	hypothetical protein	-
10379701	3169.36	3492.55	3042.5	7634.57	24063.1	13348.8	3234.8	15015.5	-2.21464	9.89e-10	2.24e-08	TERG_04327	NW_003456425.1	1230486	1232282	-	1506	protein_coding	amino acid transporter	Aa_trans
10371170	78.2183	78.8445	124.95	392.397	444.264	468.582	94.0044	435.081	-2.20833	9.73e-14	4.81e-12	TERG_07769	NW_003456418.1	41717	42300	-	447	protein_coding	hypothetical protein	-
10373580	42.6645	44.1876	62.9121	366.422	120.478	204.43	49.9214	230.444	-2.2083	3.33e-07	3.96e-06	TERG_01844	NW_003456427.1	792375	793839	+	1284	protein_coding	hypothetical protein	-
10378387	65.0126	60.6496	100.485	371.988	362.69	308.943	75.3823	347.874	-2.20494	8.64e-13	3.6e-11	TERG_03066	NW_003456426.1	893050	895128	-	1689	protein_coding	MFS peptide transporter	-
10378859	12.1899	9.53066	12.2329	58.442	37.6495	59.7212	11.3178	51.9376	-2.20351	2.71e-05	0.000193118	TERG_10521	NW_003456427.1	1669804	1669877	+	74	tRNA	tRNA-Val	-
10376053	184.88	239.133	623.878	1458.27	1583.79	1756.03	349.297	1599.36	-2.19417	4.56e-08	6.94e-07	TERG_05709	NW_003456423.1	802874	804187	-	1146	protein_coding	hypothetical protein	-
10371096	6242.22	9844.3	6881.01	28722.9	40126.9	36148.6	7655.84	34999.4	-2.19265	6.53e-17	5.64e-15	TERG_08099	NW_003456417.1	158242	160252	+	1938	protein_coding	protein phosphatase 2C	PP2C
10373031	1158.04	1232.92	1100.09	4608.57	6303.78	5024.62	1163.68	5312.33	-2.19051	1.73e-22	3.51e-20	TERG_03269	NW_003456426.1	1444636	1446340	+	1476	protein_coding	hexokinase	-
10371605	19.3006	14.7292	33.2036	123.378	90.3588	93.0273	22.4111	102.255	-2.18974	7.46e-07	8.15e-06	TERG_07516	NW_003456419.1	415314	415785	+	318	protein_coding	hypothetical protein	-
10379085	555.654	643.753	747.955	2415.6	2880.19	3589.02	649.121	2961.6	-2.18936	3.31e-18	3.77e-16	TERG_08731	NW_003456427.1	2205204	2205622	-	369	protein_coding	hypothetical protein	-
10379571	2684.82	1743.24	1772.9	8164.26	10933.4	8984.6	2066.99	9360.76	-2.17925	8.2e-17	6.82e-15	TERG_04700	NW_003456425.1	2110602	2111396	-	465	protein_coding	hypothetical protein	-
10376809	1003.63	1185.27	1190.96	3109.49	8272.85	3918.63	1126.62	5100.32	-2.17835	5.16e-10	1.23e-08	TERG_02627	NW_003456427.1	2732697	2734219	-	1461	protein_coding	hypothetical protein	-
10373631	1790.89	1402.74	899.992	4477.77	8856.42	5169.33	1364.54	6167.84	-2.17644	1.24e-10	3.35e-09	TERG_01895	NW_003456427.1	928951	930760	+	1560	protein_coding	hypothetical protein	Peptidase_S10
10375679	1756.36	1602.88	1373.58	3607.64	12435.6	5343.9	1577.61	7129.06	-2.1759	3.05e-08	4.79e-07	TERG_05659	NW_003456423.1	677894	678482	-	300	protein_coding	hypothetical protein	-
10372384	19.3006	37.2562	46.3103	195.734	109.184	159.639	34.289	154.853	-2.17116	2.64e-07	3.24e-06	TERG_05627	NW_003456423.1	589970	591044	+	959	protein_coding	hypothetical protein	-
10374558	17.269	16.462	62.9121	121.522	151.853	163.085	32.2144	145.487	-2.16974	2.21e-05	0.000161726	TERG_01307	NW_003456428.1	3463510	3464007	-	357	protein_coding	hypothetical protein	-
10372012	49.7753	58.0504	114.465	302.414	436.734	263.003	74.0969	334.051	-2.16919	1.47e-08	2.49e-07	TERG_07256	NW_003456420.1	745469	745879	+	339	protein_coding	structural toxin protein RtxA	-
10375666	5828.78	9386.83	6393.44	20020.6	42163.7	34908.2	7203.02	32364.2	-2.16767	1.12e-11	3.91e-10	TERG_05647	NW_003456423.1	644072	646282	+	1812	protein_coding	protein kinase activator Bem1	PX
10371721	61.9651	77.1117	184.367	516.702	434.224	504.185	107.815	485.037	-2.16753	3.76e-08	5.8e-07	TERG_07598	NW_003456419.1	623649	625227	+	1521	protein_coding	hypothetical protein	Peptidase_S10
10375615	36476.1	61996.1	126839	581368	99736.1	327634	75103.9	336246	-2.16256	0.00615263	0.0186663	TERG_06505	NW_003456422.1	1389764	1391972	+	1965	protein_coding	hsp70-like protein	HSP70
10376864	57.9018	57.184	170.387	352.508	581.058	345.694	95.1575	426.42	-2.16139	8.84e-07	9.53e-06	TERG_08578	NW_003456412.1	15662	16376	+	417	protein_coding	hypothetical protein	-
10377106	25.3955	19.0613	41.0676	144.714	121.733	114.849	28.5082	127.099	-2.1561	1.1e-07	1.5e-06	TERG_00036	NW_003456428.1	98947	100487	+	963	protein_coding	hypothetical protein	-
10375753	276.303	345.703	271.745	1192.03	1547.4	1236.92	297.917	1325.45	-2.15273	1.06e-18	1.36e-16	TERG_05948	NW_003456423.1	1425665	1427458	-	1518	protein_coding	beta-1%2C3-glucanosyltransferase	-
10373529	341.316	492.129	442.132	2008.37	2199.99	1464.32	425.192	1890.89	-2.15222	5.33e-16	3.99e-14	TERG_01794	NW_003456427.1	662913	664523	+	1539	protein_coding	hypothetical protein	-
10372101	41.6487	83.1767	145.921	588.131	263.547	346.843	90.2488	399.507	-2.14473	1.71e-06	1.73e-05	TERG_07108	NW_003456420.1	345322	347241	-	1920	protein_coding	cell division cycle protein Cdc20	-
10375478	93.4556	108.303	112.717	315.401	628.747	446.761	104.825	463.636	-2.14251	2.83e-11	8.94e-10	TERG_06265	NW_003456422.1	750733	752095	+	1212	protein_coding	hypothetical protein	-
10372179	5.07911	6.93139	9.61157	29.6848	38.9045	27.5636	7.20735	32.051	-2.14247	0.000760606	0.00328808	TERG_07231	NW_003456420.1	683035	683703	+	486	protein_coding	hypothetical protein	-
10371130	10.1582	6.06496	18.3494	34.3231	85.3389	33.3061	11.5242	50.9894	-2.13864	0.000764536	0.00330026	TERG_08962	NW_003456418.1	405403	405726	+	243	protein_coding	hypothetical protein	-
10379070	23.3639	38.1226	71.6499	213.36	165.658	207.876	44.3788	195.631	-2.13564	3.13e-07	3.76e-06	TERG_08730	NW_003456427.1	2169492	2169965	-	354	protein_coding	hypothetical protein	-
10371349	1459.74	1362.02	4091.03	12124.4	4738.82	13137.5	2304.26	10000.2	-2.11762	3.01e-06	2.81e-05	TERG_07957	NW_003456418.1	559325	560258	+	885	protein_coding	hypothetical protein	-
10379411	186.911	212.274	374.851	905.388	1504.73	950.946	258.012	1120.35	-2.11719	4.12e-10	1.02e-08	TERG_04725	NW_003456424.1	23880	24430	-	489	protein_coding	hypothetical protein	-
10379388	159.484	156.823	186.989	380.337	1061.72	740.773	167.765	727.609	-2.11543	5.32e-09	1.03e-07	TERG_05308	NW_003456424.1	1486523	1487431	-	741	protein_coding	hypothetical protein	-
10371551	2175.89	3336.6	2055.13	7268.15	15501.6	9665.65	2522.54	10811.8	-2.09953	1.24e-10	3.36e-09	TERG_07571	NW_003456419.1	561013	562164	+	1152	protein_coding	hypothetical protein	RGS
10378577	1213.91	1874.94	3424.34	12079.9	7595.16	8197.89	2171.06	9290.98	-2.09733	9.4e-09	1.68e-07	TERG_03251	NW_003456426.1	1402447	1403362	-	783	protein_coding	hypothetical protein	-
10373985	190.974	174.151	341.647	872.92	1104.39	1048.57	235.591	1008.62	-2.09704	1.43e-11	4.86e-10	TERG_06536	NW_003456421.1	94857	96256	-	1341	protein_coding	hypothetical protein	-
10375752	432.74	680.142	428.152	2017.64	2290.35	2276.3	513.678	2194.76	-2.09457	1.65e-15	1.13e-13	TERG_05947	NW_003456423.1	1424541	1424991	+	348	protein_coding	hypothetical protein	-
10373671	25.3955	16.462	70.7761	168.833	154.363	158.491	37.5446	160.562	-2.09383	1.94e-05	0.000144217	TERG_06955	NW_003456421.1	1123779	1125969	-	1572	protein_coding	hypothetical protein	-
10373838	63.9968	70.1803	176.503	544.531	424.185	356.03	103.56	441.582	-2.09076	2.28e-07	2.85e-06	TERG_01081	NW_003456428.1	2855363	2855914	+	552	protein_coding	hypothetical protein	-
10371200	8.12657	6.93139	21.8445	100.186	17.5698	39.0485	12.3008	52.2682	-2.09005	0.00381674	0.0126427	TERG_07782	NW_003456418.1	78201	78524	-	324	protein_coding	hypothetical protein	-
10372857	65.0126	64.9818	108.349	339.52	286.136	387.04	79.4476	337.565	-2.08558	8.28e-11	2.35e-09	TERG_04894	NW_003456424.1	456800	458343	+	1122	protein_coding	alcohol dehydrogenase	-
10373126	203.164	188.014	281.357	1067.73	982.652	798.197	224.178	949.526	-2.08232	9.11e-15	5.44e-13	TERG_03358	NW_003456426.1	1678717	1679258	+	477	protein_coding	hypothetical protein	-
10373677	98.5347	77.1117	123.203	156.773	710.321	397.376	99.6164	421.49	-2.07945	7e-06	5.84e-05	TERG_06961	NW_003456421.1	1143877	1144200	+	324	protein_coding	hypothetical protein	-
10378382	42.6645	44.1876	32.3298	98.3311	209.582	192.946	39.7273	166.953	-2.06897	2.23e-07	2.8e-06	TERG_03061	NW_003456426.1	877974	878744	-	663	protein_coding	hypothetical protein	-
10371206	1630.39	1329.09	477.957	4398	3271.74	6726.68	1145.81	4798.81	-2.06652	5.58e-07	6.32e-06	TERG_07875	NW_003456418.1	324072	324878	-	507	protein_coding	integral membrane protein	-
10372392	16.2531	13.8628	26.2134	80.7057	56.4743	98.7697	18.7764	78.6499	-2.06562	1.26e-05	9.74e-05	TERG_05428	NW_003456423.1	79230	79978	-	501	protein_coding	hypothetical protein	-
10379847	100.566	186.281	343.395	487.945	1108.15	1041.68	210.081	879.257	-2.06362	2.14e-06	2.09e-05	TERG_08815	NW_003456425.1	1559071	1559682	-	612	protein_coding	hypothetical protein	-
10375494	21.3323	14.7292	20.0969	72.3568	86.5939	74.6515	18.7195	77.8674	-2.05861	1.76e-06	1.76e-05	TERG_06280	NW_003456422.1	791919	792524	+	345	protein_coding	hypothetical protein	-
10374841	1276.89	1452.99	1714.35	3579.81	5692.61	9222.34	1481.41	6164.92	-2.05695	8.47e-10	1.94e-08	TERG_01430	NW_003456428.1	3762998	3763783	+	786	protein_coding	hypothetical protein	-
10371964	231.607	247.797	166.018	371.061	1295.14	1019.85	215.141	895.353	-2.05655	4.27e-07	4.97e-06	TERG_06985	NW_003456420.1	5562	5954	-	297	protein_coding	hypothetical protein	-
10374733	311.857	544.98	741.838	2251.41	2543.85	1826.09	532.892	2207.12	-2.04952	3.02e-10	7.69e-09	TERG_00765	NW_003456428.1	2030323	2031203	-	510	protein_coding	hypothetical protein	-
10372938	1804.1	1967.65	1492.41	5518.6	9963.32	6309.78	1754.72	7263.9	-2.04941	3.56e-13	1.55e-11	TERG_04978	NW_003456424.1	687595	689641	+	1983	protein_coding	extracellular phytase	-
10376180	714.123	716.532	562.713	2320.98	3490.11	2422.16	664.456	2744.42	-2.04617	2.21e-15	1.48e-13	TERG_03928	NW_003456425.1	187259	189107	-	1590	protein_coding	plasma membrane zinc ion transporter	-
10377371	127.994	136.028	240.289	878.486	577.293	627.073	168.104	694.284	-2.04571	4.07e-10	1.01e-08	TERG_00119	NW_003456428.1	309475	313436	-	3711	protein_coding	CAMK/CAMKL/GIN4 protein kinase	Pkinase
10374628	8.12657	31.1912	40.1938	88.1269	148.088	91.8788	26.5039	109.365	-2.03462	0.000114148	0.000664943	TERG_01375	NW_003456428.1	3630942	3631390	-	210	protein_coding	hypothetical protein	-
10373575	63.9968	113.501	64.6596	206.866	366.455	418.049	80.7193	330.457	-2.03024	6.26e-08	9.17e-07	TERG_01839	NW_003456427.1	780883	781593	-	435	protein_coding	hypothetical protein	-
10378955	148.31	140.361	200.095	567.723	737.931	687.943	162.922	664.532	-2.02688	4.07e-14	2.13e-12	TERG_02290	NW_003456427.1	1891051	1891548	+	372	protein_coding	hypothetical protein	-
10378505	20.3164	25.1263	11.3591	37.1061	143.068	51.6818	18.9339	77.2854	-2.02455	0.00066755	0.00294589	TERG_03178	NW_003456426.1	1207441	1208067	+	369	protein_coding	hypothetical protein	-
10374693	543.465	584.836	1050.28	2526.92	3343.28	2965.39	726.194	2945.2	-2.01948	2.37e-11	7.64e-10	TERG_06493	NW_003456422.1	1366649	1369026	-	1923	protein_coding	mRNA cleavage factor complex component Pcf11	-
10373768	118.851	96.173	235.046	396.107	799.425	629.37	150.024	608.301	-2.01801	2.18e-07	2.75e-06	TERG_08656	NW_003456428.1	1193007	1193519	-	369	protein_coding	hypothetical protein	-
10373576	3257.74	2805.48	684.169	4019.51	8886.54	14365.3	2249.13	9090.44	-2.015	0.0100668	0.0280717	TERG_01840	NW_003456427.1	783735	785702	+	1890	protein_coding	hypothetical protein	Peptidase_S10
10376613	20.3164	22.527	131.067	239.334	208.327	256.112	57.9701	234.591	-2.01401	0.000533047	0.00244443	TERG_03594	NW_003456426.1	2260103	2260624	+	522	protein_coding	hypothetical protein	-
10378116	1340.88	2243.17	1439.11	3583.52	10367.4	6339.64	1674.39	6763.53	-2.01394	5.97e-08	8.82e-07	TERG_02799	NW_003456426.1	228947	230395	-	1389	protein_coding	hypothetical protein	Aminotran_5
10372548	6125.4	8961.42	4977.92	14593.8	42315.5	24024	6688.25	26977.8	-2.01203	8.04e-08	1.14e-06	TERG_05067	NW_003456424.1	911584	913365	-	1433	protein_coding	hypothetical protein	-
10378501	1587.73	2226.71	2618.71	6928.63	10415.1	8552.77	2144.38	8632.17	-2.00894	1.93e-13	9.02e-12	TERG_03174	NW_003456426.1	1195915	1198117	+	1800	protein_coding	siderochrome-iron transporter Sit1	-
10371559	89.3923	129.964	272.619	525.978	778.09	674.161	163.992	659.41	-2.00548	2.85e-07	3.46e-06	TERG_07579	NW_003456419.1	580988	581488	+	168	protein_coding	hypothetical protein	-
10376560	45.712	69.3139	175.63	474.958	429.204	264.152	96.8851	389.438	-2.00502	1.13e-05	8.86e-05	TERG_03540	NW_003456426.1	2132241	2133572	-	957	protein_coding	hypothetical protein	-
10375452	1660.87	1370.68	612.519	6050.14	3769.97	4789.18	1214.69	4869.77	-2.00357	1.98e-08	3.29e-07	TERG_06347	NW_003456422.1	989123	989709	+	378	protein_coding	hypothetical protein	-
10376468	37.5854	28.592	70.7761	239.334	141.813	167.679	45.6511	182.942	-2.00295	1.61e-06	1.63e-05	TERG_04214	NW_003456425.1	935749	937208	+	1164	protein_coding	hypothetical protein	-
10378143	503.848	205.342	464.85	170.688	43.9244	76.9485	391.347	97.1869	2.00275	2.97e-05	0.000209403	TERG_02824	NW_003456426.1	297066	298442	+	1155	protein_coding	FAD binding domain-containing protein	FAD_binding_3
10375845	251.924	227.003	233.299	84.4163	38.9045	51.6818	237.409	58.3342	2.01337	1.14e-08	1.98e-07	TERG_05858	NW_003456423.1	1218802	1219310	-	509	protein_coding	hypothetical protein	-
10379799	2780.3	3818.33	3281.91	760.674	815.74	865.958	3293.51	814.124	2.01663	5.91e-19	7.96e-17	TERG_04421	NW_003456425.1	1454906	1456474	+	1389	protein_coding	hypothetical protein	-
10379115	2905.25	2918.98	2649.3	705.015	594.862	793.603	2824.51	697.827	2.0167	9.81e-20	1.53e-17	TERG_02448	NW_003456427.1	2272732	2273406	+	342	protein_coding	hypothetical protein	-
10377791	3749.4	2099.34	1151.64	664.198	490.699	573.094	2333.46	575.997	2.01776	9.77e-08	1.35e-06	TERG_08180	NW_003456417.1	342269	343794	-	1215	protein_coding	hypothetical protein	-
10377712	1984.92	1578.62	1877.75	456.405	409.125	474.324	1813.76	446.618	2.02137	1.88e-19	2.84e-17	TERG_00292	NW_003456428.1	754891	755639	-	567	protein_coding	hypothetical protein	-
10373462	900.018	970.394	973.389	322.823	174.443	199.836	947.934	232.367	2.02471	2.74e-12	1.07e-10	TERG_01729	NW_003456427.1	469206	469966	+	516	protein_coding	hypothetical protein	-
10372887	1851.84	1895.73	803.876	412.805	316.256	385.891	1517.15	371.651	2.02861	2.43e-09	5.1e-08	TERG_04926	NW_003456424.1	543259	545526	-	1866	protein_coding	hypothetical protein	-
10372375	5138.03	3707.43	6558.58	1758.83	825.779	1172.6	5134.68	1252.4	2.03495	5.45e-10	1.3e-08	TERG_05618	NW_003456423.1	559030	561419	-	1959	protein_coding	diphenol oxidase	-
10375462	1161.08	1312.63	671.936	278.295	238.447	246.924	1048.55	254.556	2.04147	1.14e-11	3.95e-10	TERG_06356	NW_003456422.1	1014744	1015275	-	402	protein_coding	hypothetical protein	-
10378723	807.578	804.907	1245.13	273.657	169.423	240.033	952.54	227.704	2.0625	5.6e-12	2.07e-10	TERG_02066	NW_003456427.1	1341516	1342947	+	1257	protein_coding	hypothetical protein	-
10376372	1606.01	713.067	1115.82	266.236	193.268	359.476	1144.97	272.993	2.06758	3.69e-09	7.37e-08	TERG_04118	NW_003456425.1	677540	679242	+	1461	protein_coding	hypothetical protein	Zn_clus
novel.56	1130.61	1149.74	844.944	279.223	209.582	250.37	1041.77	246.392	2.07809	5.04e-16	3.8e-14	-	NW_003456425.1	255702	256906	-	1140	-	-	-
10378724	1100.13	994.654	1348.24	414.66	144.323	253.815	1147.68	270.933	2.0796	7.08e-09	1.31e-07	TERG_02067	NW_003456427.1	1343224	1344305	-	1002	protein_coding	hypothetical protein	-
10374258	1770.58	1844.62	2401.14	528.761	479.404	414.603	2005.45	474.256	2.0797	8.61e-18	9.13e-16	TERG_00620	NW_003456428.1	1607325	1609237	+	1857	protein_coding	NAD kinase	NAD_kinase
10379756	2138.3	2791.62	1292.32	536.183	441.754	472.027	2074.08	483.321	2.10093	6.87e-12	2.51e-10	TERG_04382	NW_003456425.1	1360144	1361710	+	1455	protein_coding	c-14 sterol reductase	-
10372797	4997.84	4190.02	4220.35	1129.88	880.999	1103.69	4469.41	1038.19	2.10551	4.76e-21	8.47e-19	TERG_04837	NW_003456424.1	312375	312925	-	480	protein_coding	thioesterase	4HBT
10378222	15285.1	16248	17249.3	4961.08	2361.88	3953.09	16260.8	3758.68	2.11287	3.5e-13	1.54e-11	TERG_02902	NW_003456426.1	467586	469685	-	2028	protein_coding	hypothetical protein	-
10373057	11552.9	16469	15776.1	2552.9	4170.31	3382.29	14599.3	3368.5	2.11596	2.64e-15	1.74e-13	TERG_03293	NW_003456426.1	1509232	1511635	-	2331	protein_coding	hypothetical protein	-
10372330	1828.48	1964.18	1931.92	548.242	321.276	430.682	1908.2	433.4	2.13655	2.06e-16	1.66e-14	TERG_06897	NW_003456421.1	998686	999459	+	774	protein_coding	hypothetical protein	-
10377070	5121.77	7375.86	5128.21	1342.31	1415.62	1242.66	5875.28	1333.53	2.13949	5.86e-19	7.96e-17	TERG_01583	NW_003456427.1	112481	114167	+	1380	protein_coding	CaaX prenyl protease	Peptidase_M48
10371176	11811	16242	7188.58	3519.51	1616.42	2819.53	11747.2	2651.82	2.14703	1.93e-09	4.13e-08	TERG_07775	NW_003456418.1	60818	61422	-	459	protein_coding	hypothetical protein	-
10377352	733.423	791.045	792.517	224.492	120.478	173.421	772.328	172.797	2.15577	4.46e-14	2.3e-12	TERG_08346	NW_003456415.1	11784	13029	+	1089	protein_coding	hypothetical protein	-
10373295	158.468	167.22	136.309	38.9614	32.6296	31.0091	153.999	34.2	2.16557	4.19e-10	1.03e-08	TERG_02756	NW_003456426.1	104178	105124	-	378	protein_coding	hypothetical protein	-
10374207	1437.39	1699.06	2470.17	473.102	303.706	472.027	1868.87	416.279	2.16564	4.16e-13	1.79e-11	TERG_06594	NW_003456421.1	222898	223776	-	879	protein_coding	hypothetical protein	-
10378481	1450.59	1011.12	726.984	256.959	170.678	277.933	1062.9	235.19	2.17449	2.17e-11	7.13e-10	TERG_03156	NW_003456426.1	1137475	1138196	-	662	protein_coding	hypothetical protein	-
10371645	321	259.927	558.345	113.173	65.2592	72.3546	379.757	83.5957	2.17841	7.61e-09	1.39e-07	TERG_07667	NW_003456419.1	806007	807023	+	552	protein_coding	hypothetical protein	-
10372060	2132.21	3094.86	2171.34	699.449	366.455	558.164	2466.14	541.356	2.18633	3.05e-13	1.37e-11	TERG_07128	NW_003456420.1	395179	396206	+	873	protein_coding	hypothetical protein	APH
10374192	2998.71	3421.51	1961.63	608.539	656.357	571.946	2793.95	612.281	2.19014	3.08e-16	2.41e-14	TERG_06533	NW_003456421.1	87413	87969	-	480	protein_coding	hypothetical protein	-
10371314	1571.48	1365.48	1234.65	274.585	365.2	271.043	1390.54	303.609	2.19669	5.4e-19	7.51e-17	TERG_07983	NW_003456418.1	615655	616334	-	654	protein_coding	hypothetical protein	-
10372155	2167.76	2014.43	1492.41	490.728	302.451	438.721	1891.54	410.633	2.20207	1.95e-15	1.31e-13	TERG_07072	NW_003456420.1	241482	243988	-	2442	protein_coding	ATP-dependent RNA helicase DRS1	DEAD
10377187	195.038	123.899	77.7663	31.5401	31.3746	21.8212	132.234	28.2453	2.2235	7.54e-07	8.23e-06	TERG_08438	NW_003456415.1	217944	218579	-	636	protein_coding	hypothetical protein	-
10372621	1300.25	809.24	2886.09	332.099	407.87	313.536	1665.19	351.168	2.24586	2.7e-08	4.37e-07	TERG_05142	NW_003456424.1	1073184	1074426	+	1101	protein_coding	hypothetical protein	GFO_IDH_MocA
10372174	653.173	422.815	814.362	167.905	117.968	107.958	630.117	131.277	2.25964	5.99e-12	2.2e-10	TERG_07226	NW_003456420.1	663886	665396	+	1242	protein_coding	hypothetical protein	-
10374524	1293.14	1145.41	915.72	251.394	237.192	209.024	1118.09	232.537	2.26458	1.11e-19	1.7e-17	TERG_00718	NW_003456428.1	1876137	1881034	-	4410	protein_coding	ATP dependent RNA helicase	HA2
10375063	1616.17	1943.39	1474.06	455.477	384.025	206.727	1677.87	348.743	2.26534	5.98e-13	2.53e-11	TERG_01490	NW_003456428.1	3968559	3969788	+	945	protein_coding	LysR family regulatory protein	-
10377594	913.224	875.954	1128.05	268.091	145.578	183.758	972.409	199.142	2.28387	6.23e-15	3.8e-13	TERG_00255	NW_003456428.1	661009	662979	+	1358	protein_coding	trimethyllysine dioxygenase	-
10373366	368.743	350.902	1173.48	173.471	101.654	109.106	631.043	128.077	2.29857	4.94e-07	5.68e-06	TERG_01635	NW_003456427.1	238624	240943	+	2124	protein_coding	N-acetylmuramic acid-6-phosphate etherase	BcrAD_BadFG
10373954	4625.04	5844.89	2700.85	837.669	923.668	808.534	4390.26	856.624	2.35768	4.18e-15	2.64e-13	TERG_06653	NW_003456421.1	385907	389174	-	3123	protein_coding	hypothetical protein	-
10379039	1577.57	2196.38	3688.22	652.139	347.631	421.494	2487.39	473.755	2.39131	2.04e-11	6.74e-10	TERG_02374	NW_003456427.1	2081086	2083978	+	2751	protein_coding	hypothetical protein	-
10376437	2699.04	2389.6	4168.8	690.173	432.969	636.261	3085.81	586.468	2.39473	1.23e-15	8.72e-14	TERG_04183	NW_003456425.1	840908	841883	+	897	protein_coding	hypothetical protein	-
10374638	216.37	155.956	156.406	52.8761	21.3347	24.1182	176.244	32.7764	2.40829	1.1e-08	1.91e-07	TERG_01385	NW_003456428.1	3655386	3655706	+	321	protein_coding	hypothetical protein	-
10373927	72.1233	64.9818	55.9218	13.9148	13.8048	8.0394	64.3423	11.9197	2.42729	1.32e-06	1.36e-05	TERG_08922	NW_003456421.1	736912	737264	+	288	protein_coding	hypothetical protein	-
10372329	3495.44	3677.1	3143.86	757.891	507.013	640.855	3438.8	635.253	2.43534	2.9e-24	7.6e-22	TERG_06896	NW_003456421.1	995866	997509	+	1161	protein_coding	hypothetical protein	-
10379860	2132.21	2195.52	2453.57	616.888	223.387	404.267	2260.43	414.847	2.44382	7.1e-13	3e-11	TERG_04480	NW_003456425.1	1585218	1586616	+	1278	protein_coding	hypothetical protein	Zn_clus
10372609	187.927	110.036	605.529	80.7057	32.6296	50.5334	301.164	54.6229	2.45774	1.06e-05	8.39e-05	TERG_05129	NW_003456424.1	1048840	1050686	-	1491	protein_coding	cytochrome P450 monooxygenase	p450
novel.40	408.36	449.674	389.705	83.4886	67.7691	74.6515	415.913	75.3031	2.46179	7.52e-20	1.2e-17	-	NW_003456423.1	1219314	1220966	+	1491	-	-	-
10372616	941.667	622.959	2018.43	290.355	173.188	184.906	1194.35	216.15	2.46446	1.89e-09	4.08e-08	TERG_05136	NW_003456424.1	1058699	1060352	-	1539	protein_coding	hypothetical protein	p450
10373926	269.193	274.656	422.909	61.225	53.9643	58.5728	322.253	57.9207	2.47454	1.4e-14	7.99e-13	TERG_06792	NW_003456421.1	733929	734774	-	846	protein_coding	hypothetical protein	-
10377402	1650.71	1870.61	1979.98	428.575	183.228	361.773	1833.77	324.525	2.49613	4.57e-15	2.83e-13	TERG_00149	NW_003456428.1	383517	385273	+	1647	protein_coding	hypothetical protein	-
10373055	479.468	315.378	941.933	142.858	56.4743	103.364	578.926	100.899	2.516	9.79e-09	1.74e-07	TERG_03291	NW_003456426.1	1500759	1507451	+	6369	protein_coding	hypothetical protein	DNA_methylase
10376751	38.6012	16.462	20.9707	3.71061	1.25498	8.0394	25.3447	4.335	2.53723	0.0023921	0.00860286	TERG_10523	NW_003456427.1	2601787	2601860	-	74	tRNA	tRNA-Ile	-
10374427	2560.89	4275.8	2996.19	653.067	415.4	586.876	3277.62	551.781	2.5696	4.38e-19	6.18e-17	TERG_06741	NW_003456421.1	602574	604547	+	1974	protein_coding	ubiquitin C-terminal hydrolase	UCH
10374075	80.2499	39.8555	179.125	26.9019	12.5498	10.3364	99.7433	16.596	2.57195	2.6e-05	0.000186209	TERG_01153	NW_003456428.1	3039211	3040012	+	588	protein_coding	hypothetical protein	-
10374459	5959.83	5241	7820.32	1373.85	709.066	1084.17	6340.38	1055.7	2.58566	3.16e-18	3.65e-16	TERG_06627	NW_003456421.1	313834	317792	+	3624	protein_coding	hypothetical protein	-
10378697	8359.2	5966.19	14973.9	1940.65	1061.72	1783.6	9766.44	1595.32	2.61373	4.4e-13	1.88e-11	TERG_02041	NW_003456427.1	1282840	1283487	-	648	protein_coding	hypothetical protein	GST_C
10378440	3577.72	4478.54	3267.06	639.152	618.707	586.876	3774.44	614.912	2.61768	9.61e-31	4.5e-28	TERG_03116	NW_003456426.1	1039444	1040741	+	1017	protein_coding	hypothetical protein	-
10372608	299.667	190.613	830.09	76.0674	62.7492	74.6515	440.123	71.1561	2.62803	3.01e-08	4.75e-07	TERG_05128	NW_003456424.1	1047218	1048580	+	1212	protein_coding	hypothetical protein	-
10375012	1256.57	1412.27	772.42	231.913	151.853	167.679	1147.09	183.815	2.6388	1.98e-17	1.96e-15	TERG_00881	NW_003456428.1	2344154	2345307	+	1056	protein_coding	hypothetical protein	-
10374063	3011.91	2918.11	4692.19	684.607	501.994	512.224	3540.74	566.275	2.64365	1.88e-21	3.42e-19	TERG_00587	NW_003456428.1	1523519	1524733	-	1071	protein_coding	nuclear pore complex protein SonA	-
10372607	464.23	287.653	1159.5	131.727	87.8489	79.2455	637.129	99.607	2.67485	5.58e-09	1.07e-07	TERG_05127	NW_003456424.1	1045644	1047098	+	1266	protein_coding	hypothetical protein	Aminotran_1_2
10372610	1310.41	878.553	4032.49	353.435	322.531	281.379	2073.82	319.115	2.69999	3.42e-09	6.93e-08	TERG_05130	NW_003456424.1	1050837	1051867	-	981	protein_coding	hypothetical protein	Pyr_redox_2
10376239	1120.45	1850.68	1673.29	281.078	193.268	230.846	1548.14	235.064	2.71753	1.27e-21	2.4e-19	TERG_03987	NW_003456425.1	337370	339467	+	1569	protein_coding	hypothetical protein	p450
10378168	290.525	240.866	325.919	49.1655	45.1794	34.4546	285.77	42.9332	2.73092	1.49e-17	1.53e-15	TERG_02848	NW_003456426.1	358428	359462	+	861	protein_coding	hypothetical protein	adh_short
10377936	798.436	1152.34	585.432	117.812	124.243	119.442	845.404	120.499	2.81116	6.61e-20	1.07e-17	TERG_03720	NW_003456426.1	2572987	2573604	+	618	protein_coding	hypothetical protein	-
10372611	1189.53	925.34	3925.89	340.448	287.391	221.658	2013.59	283.166	2.82966	8.1e-10	1.88e-08	TERG_05131	NW_003456424.1	1052126	1053200	+	849	protein_coding	hypothetical protein	-
10374642	4663.64	2971.83	4153.07	511.136	588.587	557.015	3929.51	552.246	2.83133	8.48e-30	3.59e-27	TERG_06445	NW_003456422.1	1252565	1253936	+	1311	protein_coding	hypothetical protein	-
10375146	330.142	332.707	380.094	78.8504	18.8248	47.0879	347.647	48.2543	2.83431	1.74e-11	5.85e-10	TERG_06229	NW_003456422.1	662959	663719	-	540	protein_coding	hypothetical protein	-
10374516	14760.9	28572.9	19405.8	2908.19	2381.96	3304.19	20913.2	2864.78	2.86787	4.49e-23	1.04e-20	TERG_00710	NW_003456428.1	1844840	1846389	+	1365	protein_coding	hypothetical protein	-
10379600	1828.48	1907.86	2131.15	308.908	238.447	251.518	1955.83	266.291	2.87467	1.45e-35	9.23e-33	TERG_04224	NW_003456425.1	955106	960063	+	4782	protein_coding	hypothetical protein	ABC_tran
10373070	6061.41	7465.11	14264.4	1478.68	957.553	1232.32	9263.65	1222.85	2.92103	7.73e-18	8.29e-16	TERG_03304	NW_003456426.1	1541689	1544059	+	2142	protein_coding	hypothetical protein	AAA
10372606	1004.65	633.356	3216.38	247.683	194.522	166.53	1618.13	202.912	2.99474	4.82e-10	1.17e-08	TERG_05126	NW_003456424.1	1042597	1045414	-	2424	protein_coding	ABC heavy metal transporter	ABC_tran
10379638	8932.12	12389	6922.07	1423.95	968.848	1132.41	9414.39	1175.07	3.00168	4.1e-26	1.35e-23	TERG_04263	NW_003456425.1	1071325	1072277	+	399	protein_coding	hypothetical protein	-
10371855	787.262	825.702	1391.93	188.313	77.809	106.809	1001.63	124.31	3.0047	4.72e-16	3.62e-14	TERG_07039	NW_003456420.1	137988	139184	+	1197	protein_coding	hypothetical protein	-
10376442	612.54	920.142	223.687	86.2716	76.554	55.1273	585.457	72.651	3.00891	1.84e-11	6.14e-10	TERG_04188	NW_003456425.1	857131	857812	+	408	protein_coding	hypothetical protein	-
10377935	2099.7	4068.72	6034.32	464.753	555.958	469.731	4067.58	496.814	3.03378	5.11e-18	5.76e-16	TERG_03719	NW_003456426.1	2570668	2572763	-	1962	protein_coding	MFS sugar transporter	Sugar_tr
10376766	6358.03	8918.96	7042.66	820.044	904.843	948.649	7439.88	891.179	3.0618	2.12e-40	2.1e-37	TERG_02584	NW_003456427.1	2634874	2637639	-	2325	protein_coding	hypothetical protein	-
10378327	1735.02	1663.53	8664.39	829.32	133.028	437.573	4020.98	466.641	3.10684	0.00281246	0.00985176	TERG_03008	NW_003456426.1	728930	730163	+	1041	protein_coding	hypothetical protein	ADH_zinc_N
10378343	12348.3	12875.1	6253.63	1326.54	988.927	1284.01	10492.3	1199.83	3.12818	3.34e-24	8.5e-22	TERG_03023	NW_003456426.1	766081	766710	-	630	protein_coding	hypothetical protein	-
10376658	4138.46	3294.14	3642.78	591.842	247.232	368.664	3691.79	402.579	3.19464	1.88e-23	4.53e-21	TERG_03641	NW_003456426.1	2377021	2377821	+	801	protein_coding	hypothetical protein	-
10373367	2365.85	2697.18	7054.89	452.694	375.24	473.176	4039.3	433.703	3.21914	1.03e-16	8.49e-15	TERG_01636	NW_003456427.1	240984	242663	-	1467	protein_coding	hypothetical protein	-
10373542	291.541	367.364	220.192	52.8761	10.0399	24.1182	293.032	29.0114	3.31369	3.59e-12	1.37e-10	TERG_01807	NW_003456427.1	702667	703107	-	375	protein_coding	hypothetical protein	-
10376791	1869.11	1549.17	3883.07	358.073	111.694	253.815	2433.78	241.194	3.33258	1.12e-14	6.46e-13	TERG_02609	NW_003456427.1	2694199	2695148	+	897	protein_coding	sucrase/ferredoxin domain-containing protein	-
10372615	633.873	475.667	2339.98	112.246	84.0839	83.8394	1149.84	93.3897	3.62061	2.84e-13	1.28e-11	TERG_05135	NW_003456424.1	1057669	1058565	+	723	protein_coding	hypothetical protein	GST_C
novel.7	4421.87	7695.57	31479.6	709.653	1295.14	1177.2	14532.4	1060.66	3.7763	1.8e-05	0.000134384	-	NW_003456417.1	216653	218217	-	1565	-	-	-
10376765	43950.5	60881	25390.3	2192.04	2993.14	3034.3	43407.3	2739.83	3.9859	9.46e-35	5.61e-32	TERG_02583	NW_003456427.1	2631873	2634191	-	2205	protein_coding	phosphate permease	Sugar_tr
10375732	28275.4	53205.3	36528.3	1217.08	2384.47	1907.63	39336.3	1836.39	4.42129	9.09e-43	1.35e-39	TERG_05445	NW_003456423.1	115311	116456	-	1008	protein_coding	hypothetical protein	-
10375253	31701.8	30993.7	25402.5	1526.91	985.162	1527.49	29366	1346.52	4.44639	2.89e-68	8.56e-65	TERG_00967	NW_003456428.1	2556495	2556880	-	267	protein_coding	hypothetical protein	-
10377636	2778.27	1716.39	3983.56	158.628	104.164	79.2455	2826.07	114.013	4.62744	1.89e-37	1.4e-34	TERG_08182	NW_003456417.1	347464	348316	-	786	protein_coding	hypothetical protein	-
10374072	11671.8	2780.35	9086.42	397.962	119.223	211.321	7846.19	242.836	5.01167	6.48e-25	1.8e-22	TERG_01150	NW_003456428.1	3031819	3032646	-	705	protein_coding	hypothetical protein	-
